# Supplementary material for: Contesting State-Led Patriarchy—The Drivers, Demands and Dynamics of Women’s Participation in the Gezi Uprisings in Turkey 2013
Source: MDPI journal article supplement (doi:10.3390/soc13120258), 2023-12-14
Supplement: s1 [file s1]

## Supplementary Materials

### Questionnaire on Women in Turkey *Participation and Non-Participation in the Gezi Park Protests*

My name is Nora Stein, I am a master student at the University of Hamburg, Germany. I am conducting interviews as part of my research for my master thesis about women in Turkey and their reasons to participate or not to participate in the Gezi Park protests 2013. I would appreciate it greatly if you would help me by answering a couple of questions. It will take around 15 minutes to fill out the questionnaire survey. Please answer honestly and accurately.

Before proceeding with the questions, I would like to state a few points. **There are no right or wrong answers.** The most valuable answer is the one that truly reflects your views. **You are not asked to mention your name and your answers will not be sent anywhere or to anybody.** Therefore, nobody will know what your answers to these questions were. Your anonymity is thereby guaranteed at all times.

**Thank you a lot for your participation!**

#### Some advice for filling out the questionnaire

**Please answer every question - except you are asked to jump ahead to another question:**

**Example:**

**Question 44: How involved have you been in the Gezi Park protests?**

☐ Very strongly

☐ Somewhat strongly

**Please choose one answer only unless you are explicitly asked to choose more! If**

**you need to correct an answer, please do it like this:**

|                          |                                     |                          |                                     |                          |                          |                          |
|--------------------------|-------------------------------------|--------------------------|-------------------------------------|--------------------------|--------------------------|--------------------------|
| <input type="checkbox"/> | <input checked="" type="checkbox"/> | <input type="checkbox"/> | <input checked="" type="checkbox"/> | <input type="checkbox"/> | <input type="checkbox"/> | <input type="checkbox"/> |
|--------------------------|-------------------------------------|--------------------------|-------------------------------------|--------------------------|--------------------------|--------------------------|

1. What is your age? \_\_\_\_\_
2. What is your gender?
- Δ Male
- Δ Female
- Δ Other
3. What is your religious denomination?
- \_\_\_\_\_
4. What kind of education did you acquire?
- Δ No formal education
- Δ Primary School
- Δ Middle School
- Δ High School
- Δ College
5. What is your employment status?
- Δ Student
- Δ Employed full-time
- Δ Employed part-time
- Δ Domestic work
- Δ Unemployed
- Δ Unable to work
- Δ Other
6. What is your relationship status?
- Δ Single
- Δ In a relationship
- Δ Married
- Δ Divorced
- Δ Widowed
7. How many children do you have?
- \_\_\_\_\_
8. What is your living situation?
- Δ Alone
- Δ With partner
- Δ With children
- Δ Shared living
- Δ With parents

9. I see myself as someone who...

|                                                       | Strongly agree           | To some extent           | Slightly disagree        | Strongly disagree        |
|-------------------------------------------------------|--------------------------|--------------------------|--------------------------|--------------------------|
| ... is rather reserved and quiet                      | <input type="checkbox"/> | <input type="checkbox"/> | <input type="checkbox"/> | <input type="checkbox"/> |
| ... is rather lazy                                    | <input type="checkbox"/> | <input type="checkbox"/> | <input type="checkbox"/> | <input type="checkbox"/> |
| ... trusts other people easily and believes in people | <input type="checkbox"/> | <input type="checkbox"/> | <input type="checkbox"/> | <input type="checkbox"/> |
| ... is rather calm and not easily stressed out        | <input type="checkbox"/> | <input type="checkbox"/> | <input type="checkbox"/> | <input type="checkbox"/> |
| ... is rather uncreative                              | <input type="checkbox"/> | <input type="checkbox"/> | <input type="checkbox"/> | <input type="checkbox"/> |

|                                                    |                          |                          |                          |                          |
|----------------------------------------------------|--------------------------|--------------------------|--------------------------|--------------------------|
| ... is extraverted and enthusiastic                | <input type="checkbox"/> | <input type="checkbox"/> | <input type="checkbox"/> | <input type="checkbox"/> |
| ... tends to be critical towards others            | <input type="checkbox"/> | <input type="checkbox"/> | <input type="checkbox"/> | <input type="checkbox"/> |
| ... is rather self-disciplined                     | <input type="checkbox"/> | <input type="checkbox"/> | <input type="checkbox"/> | <input type="checkbox"/> |
| ... is rather anxious and easily upset             | <input type="checkbox"/> | <input type="checkbox"/> | <input type="checkbox"/> | <input type="checkbox"/> |
| ... is rather creative and open to new experiences | <input type="checkbox"/> | <input type="checkbox"/> | <input type="checkbox"/> | <input type="checkbox"/> |
| ... is rather sympathetic and warm                 | <input type="checkbox"/> | <input type="checkbox"/> | <input type="checkbox"/> | <input type="checkbox"/> |

10. Generally in life, I think:

|                                                                                                      | Strongly agree           | To some extent           | Slightly disagree        | Strongly disagree        |
|------------------------------------------------------------------------------------------------------|--------------------------|--------------------------|--------------------------|--------------------------|
| If a person is lucky and successful essentially depends on his or her own attitude and behavior.     | <input type="checkbox"/> | <input type="checkbox"/> | <input type="checkbox"/> | <input type="checkbox"/> |
| My life is determined my own decisions.                                                              | <input type="checkbox"/> | <input type="checkbox"/> | <input type="checkbox"/> | <input type="checkbox"/> |
| How successful a person is depends on the conditions that are provided within a state and a society. | <input type="checkbox"/> | <input type="checkbox"/> | <input type="checkbox"/> | <input type="checkbox"/> |
| Economic and political conditions strongly determine the course of a person's life.                  | <input type="checkbox"/> | <input type="checkbox"/> | <input type="checkbox"/> | <input type="checkbox"/> |
| Life is mostly determined by other people.                                                           | <input type="checkbox"/> | <input type="checkbox"/> | <input type="checkbox"/> | <input type="checkbox"/> |
| If a person can achieve his or her dreams is mainly determined by others.                            | <input type="checkbox"/> | <input type="checkbox"/> | <input type="checkbox"/> | <input type="checkbox"/> |
| Individuals and their actions have no impact on a society.                                           | <input type="checkbox"/> | <input type="checkbox"/> | <input type="checkbox"/> | <input type="checkbox"/> |
| Every individual is part of the society and therefore is able to actively shape and frame it.        | <input type="checkbox"/> | <input type="checkbox"/> | <input type="checkbox"/> | <input type="checkbox"/> |

|                                                                 |                          |                          |                          |                          |
|-----------------------------------------------------------------|--------------------------|--------------------------|--------------------------|--------------------------|
| <b>There are multiple opportunities to influence a society.</b> | <input type="checkbox"/> | <input type="checkbox"/> | <input type="checkbox"/> | <input type="checkbox"/> |
|-----------------------------------------------------------------|--------------------------|--------------------------|--------------------------|--------------------------|

**11. How interested are you in politics?**

- ☐ Strongly Interested  
☐ Interested  
☐ Slightly interested  
☐ Not interested

- ☐ Very satisfied  
☐ Somewhat satisfied  
☐ Slightly dissatisfied  
☐ Strongly dissatisfied

**12. To what extent are you affiliated with any kind of political group?**

- ☐ Very actively affiliated  
☐ Actively affiliated  
☐ Passively affiliated  
☐ Not at all affiliated

**14. To what extent do you trust your current government?**

- ☐ Very strongly  
☐ Somewhat strongly  
☐ Not very strongly  
☐ Not strongly at all

**13. In general, how satisfied or dissatisfied are you with the present status of the democratic system in Turkey**

- ☐ Very strongly  
☐ Somewhat strongly  
☐ Not very strongly  
☐ Not strongly at all

**15. To what extent do you feel disappointed by your current government?**

**16. In your opinion, what are the most pressing social and societal issues in Turkey?**

|                          | Strongly agree           | To some extent           | Slightly disagree        | Strongly disagree        |
|--------------------------|--------------------------|--------------------------|--------------------------|--------------------------|
| <b>Corruption</b>        | <input type="checkbox"/> | <input type="checkbox"/> | <input type="checkbox"/> | <input type="checkbox"/> |
| <b>Social inequality</b> | <input type="checkbox"/> | <input type="checkbox"/> | <input type="checkbox"/> | <input type="checkbox"/> |
| <b>Gender inequality</b> | <input type="checkbox"/> | <input type="checkbox"/> | <input type="checkbox"/> | <input type="checkbox"/> |
| <b>Economy</b>           | <input type="checkbox"/> | <input type="checkbox"/> | <input type="checkbox"/> | <input type="checkbox"/> |
| <b>Unemployment</b>      | <input type="checkbox"/> | <input type="checkbox"/> | <input type="checkbox"/> | <input type="checkbox"/> |

|                               |                          |                          |                          |                          |
|-------------------------------|--------------------------|--------------------------|--------------------------|--------------------------|
| <b>Violence against women</b> | <input type="checkbox"/> | <input type="checkbox"/> | <input type="checkbox"/> | <input type="checkbox"/> |
| <b>Religion</b>               | <input type="checkbox"/> | <input type="checkbox"/> | <input type="checkbox"/> | <input type="checkbox"/> |

**17. To what extent do you think that the politics of the current government are in line with your interests as a woman?**

- Δ Very strongly
- Δ Somewhat strongly
- Δ Not very strongly
- Δ Not strongly at all

**20. To what extent do you consider the equality of men and women necessary in a democracy?**

- Δ Very much
- Δ To some extent
- Δ Very little
- Δ Not at all

**18. The current government is strongly restricting my lifestyle.**

- Δ I strongly agree
- Δ I agree to some extent
- Δ I slightly disagree
- Δ I strongly disagree

**21. Women and men are mostly equal in Turkey.**

- Δ I strongly agree
- Δ I agree to some extent
- Δ I don't agree
- Δ I don't agree at all

**19. How sufficiently do you think gender-related issues such as equal pay or violence against women are dealt with in Turkish politics?**

- Δ Very sufficiently
- Δ Somewhat sufficiently
- Δ Not very sufficiently
- Δ Not sufficiently at all

**22. It is not appropriate for a woman to become involved in politics.**

- Δ I strongly agree
- Δ I agree to some extent
- Δ I don't agree
- Δ I don't agree at all

**23. To what extent do you agree that women and men have the same opportunities in Turkey?**

|                             | Strongly agree           | To some extent           | Slightly disagree        | Strongly disagree        |
|-----------------------------|--------------------------|--------------------------|--------------------------|--------------------------|
| <b>... in the workplace</b> | <input type="checkbox"/> | <input type="checkbox"/> | <input type="checkbox"/> | <input type="checkbox"/> |
| <b>... in the family</b>    | <input type="checkbox"/> | <input type="checkbox"/> | <input type="checkbox"/> | <input type="checkbox"/> |
| <b>... in politics</b>      | <input type="checkbox"/> | <input type="checkbox"/> | <input type="checkbox"/> | <input type="checkbox"/> |

|                |                          |                          |                          |                          |
|----------------|--------------------------|--------------------------|--------------------------|--------------------------|
| ... in society | <input type="checkbox"/> | <input type="checkbox"/> | <input type="checkbox"/> | <input type="checkbox"/> |
|----------------|--------------------------|--------------------------|--------------------------|--------------------------|

**24. Religious norms and values are threatening the current lifestyle of women in Turkey.**

- Δ I strongly agree
- Δ I agree to some extent
- Δ I slightly disagree
- Δ I do not agree at all

**25. How strongly do you agree that Turkey is currently taking steps backwards in terms of gender equality?**

- Δ Very much
- Δ To some extent
- Δ Very little
- Δ Not at all

**26. Women in Turkey are facing more challenges today than they did 5 years ago.**

- Δ I strongly agree
- Δ I agree somewhat
- Δ I disagree
- Δ I strongly disagree

**27. Discrimination against women is very common in Turkey.**

- Δ I strongly agree
- Δ I agree to some extent
- Δ I don't agree strongly
- Δ I don't agree at all

**28. To what extent do you think women are being discriminated against in Turkish family law?**

- Δ Very much
- Δ To some extent
- Δ Very little
- Δ Not at all

**29. To what extent do you think women are being discriminated against in Turkish politics?**

- Δ Very much
- Δ To some extent
- Δ Very little
- Δ Not at all

**30. To what extent do you think that women are being discriminated against in Turkish media?**

- Δ Very much
- Δ To some extent
- Δ Very little
- Δ Not at all

**31. To what extent do you think women in Turkey are exposed to sexual and domestic violence?**

- Δ Very much
- Δ To some extent
- Δ Very little
- Δ Not at all

**32. In the last 12 months, how often have you been worried that any of the following might physically attack or hurt you?**

|                                | Very of- ten             | Often                    | Sometimes                | Never                    |
|--------------------------------|--------------------------|--------------------------|--------------------------|--------------------------|
| Someone you don't know         | <input type="checkbox"/> | <input type="checkbox"/> | <input type="checkbox"/> | <input type="checkbox"/> |
| Someone from work/your studies | <input type="checkbox"/> | <input type="checkbox"/> | <input type="checkbox"/> | <input type="checkbox"/> |
| Another acquaintance or friend | <input type="checkbox"/> | <input type="checkbox"/> | <input type="checkbox"/> | <input type="checkbox"/> |
| A relative of family member    | <input type="checkbox"/> | <input type="checkbox"/> | <input type="checkbox"/> | <input type="checkbox"/> |
| Your current partner           | <input type="checkbox"/> | <input type="checkbox"/> | <input type="checkbox"/> | <input type="checkbox"/> |
| Your previous partner          | <input type="checkbox"/> | <input type="checkbox"/> | <input type="checkbox"/> | <input type="checkbox"/> |

**33. In the last 12 months, how often have you experienced any of the following situations?**

|                                                                    | Very of- ten             | Often                    | Sometimes                | Never                    |
|--------------------------------------------------------------------|--------------------------|--------------------------|--------------------------|--------------------------|
| Inappropriate staring that made you feel intimidated               | <input type="checkbox"/> | <input type="checkbox"/> | <input type="checkbox"/> | <input type="checkbox"/> |
| Unwelcome touching, hugging, kissing                               | <input type="checkbox"/> | <input type="checkbox"/> | <input type="checkbox"/> | <input type="checkbox"/> |
| Sexual suggestive comments or jokes that made you feel offended    | <input type="checkbox"/> | <input type="checkbox"/> | <input type="checkbox"/> | <input type="checkbox"/> |
| Somebody indecently exposing themselves to you                     | <input type="checkbox"/> | <input type="checkbox"/> | <input type="checkbox"/> | <input type="checkbox"/> |
| Inappropriate invitations to go out on dates                       | <input type="checkbox"/> | <input type="checkbox"/> | <input type="checkbox"/> | <input type="checkbox"/> |
| Unwanted sexually explicit emails, messages, SMS that offended you | <input type="checkbox"/> | <input type="checkbox"/> | <input type="checkbox"/> | <input type="checkbox"/> |

**34. How often do you hear about women who have been targeted by any form of domestic violence?**

- Δ Very often
- Δ Somewhat often
- Δ Sometimes
- Δ Not very often

**35. The state should provide stronger support for women on the matter of domestic violence.**

- Δ I strongly agree
- Δ I agree to some extent
- Δ I slightly disagree
- Δ I strongly disagree

**36. What does gender equality mean to you?**

|                                                                                                                                                  | Strongly agree           | To some extent           | Slightly disagree        | Strongly disagree        |
|--------------------------------------------------------------------------------------------------------------------------------------------------|--------------------------|--------------------------|--------------------------|--------------------------|
| <b>Women and men have the same rights and obligations in a society</b>                                                                           | <input type="checkbox"/> | <input type="checkbox"/> | <input type="checkbox"/> | <input type="checkbox"/> |
| <b>Women and men have the same rights but different obligations due to their specific role in a society</b>                                      | <input type="checkbox"/> | <input type="checkbox"/> | <input type="checkbox"/> | <input type="checkbox"/> |
| <b>Women need to be positively discriminated for now, as they have been suffering from male dominance for centuries</b>                          | <input type="checkbox"/> | <input type="checkbox"/> | <input type="checkbox"/> | <input type="checkbox"/> |
| <b>I don't believe in the equality of women and men as they are different in both their rights and obligations and should be treated as such</b> | <input type="checkbox"/> | <input type="checkbox"/> | <input type="checkbox"/> | <input type="checkbox"/> |

**37. Men's preference should be earning money while women's should be to stay at home and take care of household and children.**

- Δ I strongly agree
- Δ I agree to some extent
- Δ I slightly disagree
- Δ I strongly disagree

**39. To what extent would you agree that the problem of inequality for women has not been eliminated yet?**

- Δ Very much
- Δ To some extent
- Δ Very little
- Δ Not at all

**38. To what extent do you think women should work before their youngest child is at school?**

- Δ Very much
- Δ To some extent
- Δ Not very much
- Δ Not at all

**40. To what extent have you been involved in any kind of women's organization in the last 12 months?**

- Δ Very much
- Δ To some extent
- Δ Very little
- Δ Not at all

**41. How would you describe your engagement with the organization?**



- Δ Very active
- Δ Somewhat active
- Δ Not very active
- Δ Not at all

**42. What do you think about feminism?**

- Δ It is needed and I strongly support it
- Δ It is needed but I don't support it
- Δ It is not needed and I don't support it
- Δ It is not needed and I strongly oppose it

**43. To what extent would you consider yourself a feminist?**

- Δ Very strongly
- Δ To some extent
- Δ Very little
- Δ Not at all

**44. How often, if ever, have you felt you were treated unfairly because of your gender?**

- Δ Very often
- Δ Sometimes
- Δ Not very often
- Δ Never

**45. How involved have you been in the Gezi Park protests?**

- Δ Very strongly
- Δ Somewhat strongly
- Δ Not very strongly
- Δ Not at all (→ *Go to Question 52*)

**46. Did you come to the protest?**

- Δ With partner
- Δ With family members
- Δ With friends
- Δ With colleagues/fellow students
- Δ With fellow organization members
- Δ Alone
- Δ Other

**47. How frequently did you participate in the protests?**

- Δ Very frequently
- Δ Somewhat frequently
- Δ Slightly frequently
- Δ Not frequently

**48. What forms did your protest take?**

|                                                             | Very of- ten             | Often                    | Sometimes                | Never                    |
|-------------------------------------------------------------|--------------------------|--------------------------|--------------------------|--------------------------|
| <b>Displaying signs</b>                                     | <input type="checkbox"/> | <input type="checkbox"/> | <input type="checkbox"/> | <input type="checkbox"/> |
| <b>Sit-ins</b>                                              | <input type="checkbox"/> | <input type="checkbox"/> | <input type="checkbox"/> | <input type="checkbox"/> |
| <b>Disguise</b>                                             | <input type="checkbox"/> | <input type="checkbox"/> | <input type="checkbox"/> | <input type="checkbox"/> |
| <b>Social Networking</b>                                    | <input type="checkbox"/> | <input type="checkbox"/> | <input type="checkbox"/> | <input type="checkbox"/> |
| <b>Human chains</b>                                         | <input type="checkbox"/> | <input type="checkbox"/> | <input type="checkbox"/> | <input type="checkbox"/> |
| <b>Shouting</b>                                             | <input type="checkbox"/> | <input type="checkbox"/> | <input type="checkbox"/> | <input type="checkbox"/> |
| <b>Throwing stones</b>                                      | <input type="checkbox"/> | <input type="checkbox"/> | <input type="checkbox"/> | <input type="checkbox"/> |
| <b>Providing medical assistance to wounded participants</b> | <input type="checkbox"/> | <input type="checkbox"/> | <input type="checkbox"/> | <input type="checkbox"/> |
| <b>Providing food and drinks, etc.</b>                      | <input type="checkbox"/> | <input type="checkbox"/> | <input type="checkbox"/> | <input type="checkbox"/> |
| <b>Participated in protest march</b>                        | <input type="checkbox"/> | <input type="checkbox"/> | <input type="checkbox"/> | <input type="checkbox"/> |
| <b>Spray-paint protest slogans on walls</b>                 | <input type="checkbox"/> | <input type="checkbox"/> | <input type="checkbox"/> | <input type="checkbox"/> |

**49. To what extent do you identify with other people present at the demonstrations?**

- Δ Very much
- Δ To some extent
- Δ Very little
- Δ Not at all

**50. During the protests I strongly identified myself with other protest participants of my gender.**

- Δ I strongly agree
- Δ I agree to some extent
- Δ I slightly disagree
- Δ I do not agree at all

**51. I participated primarily to demonstrate my solidarity with other female protestors.**

- Δ I completely agree
- Δ I partly agree
- Δ I disagree
- Δ I completely disagree

**52. To what extent have you been involved in any kind of feminist activity during the protests?**

- Δ Very much
- Δ To some extent
- Δ Very little
- Δ Not at all

**53. How frequently have gender-related issues been addressed during the Gezi protests?**

- Δ Very frequently
- Δ Somewhat frequently
- Δ Not very frequently
- Δ Not at all

**54. When you decided not to participate in the protests, what were the major reasons?**

|                                                                            | Strongly agree           | To some extent           | Slightly disagree        | Strongly disagree        |
|----------------------------------------------------------------------------|--------------------------|--------------------------|--------------------------|--------------------------|
| <b>I did not agree with the aims of the protest</b>                        | <input type="checkbox"/> | <input type="checkbox"/> | <input type="checkbox"/> | <input type="checkbox"/> |
| <b>I did not demonstrate in order to show my loyalty to the government</b> | <input type="checkbox"/> | <input type="checkbox"/> | <input type="checkbox"/> | <input type="checkbox"/> |
| <b>I was scared to participate because I don't trust the protestors</b>    | <input type="checkbox"/> | <input type="checkbox"/> | <input type="checkbox"/> | <input type="checkbox"/> |
| <b>I was scared to participate because I don't trust the police</b>        | <input type="checkbox"/> | <input type="checkbox"/> | <input type="checkbox"/> | <input type="checkbox"/> |
| <b>My family did not want me to participate</b>                            | <input type="checkbox"/> | <input type="checkbox"/> | <input type="checkbox"/> | <input type="checkbox"/> |
| <b>My husband did not want me to participate</b>                           | <input type="checkbox"/> | <input type="checkbox"/> | <input type="checkbox"/> | <input type="checkbox"/> |
| <b>I was scared to lose my job</b>                                         | <input type="checkbox"/> | <input type="checkbox"/> | <input type="checkbox"/> | <input type="checkbox"/> |

|                                                                           |                          |                          |                          |                          |
|---------------------------------------------------------------------------|--------------------------|--------------------------|--------------------------|--------------------------|
| <b>I was scared to get my family in trouble</b>                           | <input type="checkbox"/> | <input type="checkbox"/> | <input type="checkbox"/> | <input type="checkbox"/> |
| <b>I was scared to get arrested</b>                                       | <input type="checkbox"/> | <input type="checkbox"/> | <input type="checkbox"/> | <input type="checkbox"/> |
| <b>I was scared to participate because I am a woman</b>                   | <input type="checkbox"/> | <input type="checkbox"/> | <input type="checkbox"/> | <input type="checkbox"/> |
| <b>I did not participate because I am a woman</b>                         | <input type="checkbox"/> | <input type="checkbox"/> | <input type="checkbox"/> | <input type="checkbox"/> |
| <b>I did not participate because I was not interested in the protests</b> | <input type="checkbox"/> | <input type="checkbox"/> | <input type="checkbox"/> | <input type="checkbox"/> |
| <b>I did not participate because I did not have time</b>                  | <input type="checkbox"/> | <input type="checkbox"/> | <input type="checkbox"/> | <input type="checkbox"/> |

**55. How important do you think was the role that women played during the protests?**

- Δ Very important
- Δ Somewhat important
- Δ Marginally important
- Δ Not important

**56. How important do you think was the issue of gender equality during the Gezi protests?**

- Δ Very important
- Δ Somewhat important
- Δ Marginally important
- Δ Not important

**57. Those issues that have been addressed by feminist action during the protests are important for a majority of women in Turkey?**

- Δ I strongly agree
- Δ I agree to some extent
- Δ I slightly disagree
- Δ I do not agree at all

**58. Looking back, to what extent do you think that women should have played a bigger role in the protests?**

- ☐ Very much
- ☐ To some extent
- ☐ Very little
- ☐ Not at all

**59. Looking ahead, what would you personally wish for to happen for women in the next five years in Turkey. (If possible, please answer in English)**

---

---

---

---

---
