# Supplementary material for: Contesting State-Led Patriarchy—The Drivers, Demands and Dynamics of Women’s Participation in the Gezi Uprisings in Turkey 2013
Source: MDPI journal article supplement (doi:10.3390/soc13120258), 2023-12-14
Supplement: s1 [file s1]

Archive with 1 entries (1 files):
- societies-2616842-supplementary.pdf
